# Supplementary material for: Estimating mortality among inpatients with acute exacerbation of chronic obstructive pulmonary disease using registry data
Source: PubMed Central journal article supplement (PMC7297959; doi:10.1038/s41533-020-0186-y), 2020-06-16
Supplement: 41533_2020_186_MOESM1_ESM.pdf [file 41533_2020_186_MOESM1_ESM.pdf]

Supplementary Table 1 Observing variables of the ACURE study

| Data module          | Variable                                                                                                                                                                                                                                                                                                                                                                                                                                                                                                                                                                                                                                                                           |
|----------------------|------------------------------------------------------------------------------------------------------------------------------------------------------------------------------------------------------------------------------------------------------------------------------------------------------------------------------------------------------------------------------------------------------------------------------------------------------------------------------------------------------------------------------------------------------------------------------------------------------------------------------------------------------------------------------------|
| Baseline Survey      |                                                                                                                                                                                                                                                                                                                                                                                                                                                                                                                                                                                                                                                                                    |
| Medical history      | Demographic data<br>Symptoms of the current AECOPD before hospitalization<br>Potential stimulus of the current AECOPD<br>Treatment against exacerbation before hospitalization<br>Age of first diagnosis of COPD<br>Frequency of hospitalization<br>Respiratory symptoms<br>Disease history other than COPD<br>History of surgery<br>COPD management at stable stage<br>Preventive medicine use<br>Allergic history and occupational exposure history<br>Tobacco exposure                                                                                                                                                                                                          |
| Physical examination | Weight and height<br>Heart and breath frequency<br>Blood pressure and body temperature                                                                                                                                                                                                                                                                                                                                                                                                                                                                                                                                                                                             |
| Inpatient diagnosis  | AECOPD confirmation<br>Comorbidities: respiratory, cardiovascular, metabolic, digestive, cancer, anxiety/depression, etc.                                                                                                                                                                                                                                                                                                                                                                                                                                                                                                                                                          |
| Questionnaires       | PEACE<br>CAT and mMRC                                                                                                                                                                                                                                                                                                                                                                                                                                                                                                                                                                                                                                                              |
| Medical examinations | Pulmonary function test: FEV1, FVC, IC, VC, FRC, RV, TLCO, DLCO<br>Blood gas analysis (record oxygen therapy and ventilation): pH, PaO <sub>2</sub> , HCO <sub>3</sub> , Lac<br>CT: diagnosis, photographic images stored with original size<br>Echocardiography: diagnosis with LVEF, PASP<br>V/Q SPECT: diagnosis<br>Lower extremity venous ultrasound: : diagnosis<br>ECG<br>Pathogen examination<br>Serology and urine antigen examination<br>Lab test: WBC, NE%, LY%, EO%, RBC, HCT, PLT, NE, LY, EO, HGB; ALB, CHOL, AST, TBIL, ALP, BUN, Ca, Na, Glu, LDH, TG, ALT, DBIL, γ-GT, Cr, Cl, K, CK, PCT, hs-CRP, ESR, Fbg, NTproBNP, D-dimer, HbA1C, Total-IgE, hs-cTnT, hs-cTnl |
| Treatment            | Medicine<br>Route of administration<br>Dose<br>Starting/end date                                                                                                                                                                                                                                                                                                                                                                                                                                                                                                                                                                                                                   |

|                           |                                                                                                                                             |
|---------------------------|---------------------------------------------------------------------------------------------------------------------------------------------|
| Endpoint measurement      | AECOPD controlled, discharge upon request,                                                                                                  |
| Diagnosis at discharge    | Cause of death<br>AECOPD confirmation<br>Comorbidities: respiratory, cardiovascular, metabolic, digestive, cancer, anxiety/depression, etc. |
| RICU/ICU stay             | Ventilation types, duration<br>Vasoactive drug use                                                                                          |
| Costs                     | Health insurance type<br>Direct healthcare cost                                                                                             |
| Follow-up survey          |                                                                                                                                             |
| Endpoint measurement      | Death                                                                                                                                       |
| AECOPD recurrence         | Cause of death<br>Recurrence: severity assessment<br>Newly diagnosed comorbidities                                                          |
| Re-admission              | Re-admission date and duration                                                                                                              |
| Treatment                 | Medicine<br>Route of administration<br>Dose<br>Starting/end date<br>Non-pharmacological treatment                                           |
| Medical examinations      | Pulmonary function test: FEV1, FVC, IC, VC, FRC,RV,TLCO, DLCO<br>CT: diagnosis, photographic images stored with original size               |
| AECOPD assessment         | Dyspnea<br>Sputum<br>Upper respiratory tract infection<br>Fever<br>Wheezing<br>Cough<br>Breath rate or pulse rate                           |
| Scales and questionnaires | CAT and mMRC<br>SGRQ<br>HADS                                                                                                                |

---
